# Supplementary material for: An Smp43-Derived Short-Chain α-Helical Peptide Displays a Unique Sequence and Possesses Antimicrobial Activity against Both Gram-Positive and Gram-Negative Bacteria
Source: MDPI journal article supplement (doi:10.3390/toxins13050343), 2021-05-11
Supplement: s1 [file s1]

## Supplementary Materials: An Smp43-Derived Short-Chain $\alpha$ -Helical Peptide Displays a Unique Sequence and Possesses Antimicrobial Activity against Both Gram-Positive and Gram-Negative Bacteria

Xudong Luo, Li Ding, Xiangdong Ye, Wen Zhu, Kaiyue Zhang, Fangyan Li, Huiwen Jiang, Zhiwen Zhao and Zongyun Chen

**Table S1.** Sequence alignments of scorpion venom-derived long-chain noncysteine-containing AMPs.

| Name          | Sequence                                                  | AA <sup>a</sup> | Identity% | Reference |
|---------------|-----------------------------------------------------------|-----------------|-----------|-----------|
| Smp43         | G-VWDWIKKTAGKIWNSEPVKALKSQALNAAKNFVAEKIGATPS              | 43              | 100       | [1]       |
| Opistoporin-2 | GKVWDWIKSTAKKLWNSEPVKELKNTALNAAKNFVAEKIGATPS              | 44              | 84.1      | [2]       |
| Opistoporin-1 | GKVWDWIKSTAKKLWNSEPVKELKNTALNAAKNLVAEKIGATPS              | 44              | 81.8      | [2]       |
| Pandinin-1    | GKVWDWIKSAAKKIWSSEPVSQKQVLNAAKNYVAEKIGATPT                | 44              | 75.0      | [3]       |
| Heterin-1     | G-VWDWLKKTAKNVWNSDIVKQLKGKAINAAKNYVAEKIGATPS              | 43              | 74.4      | [4]       |
| Hadrurin      | G-ILDTIKSIASKVWNSKTVQDLKRKGIN----WVANKLGVSPQAA            | 41              | 40.0      | [5]       |
| Vejovine      | G-IWSSIKNLASKAWNSDIGQSLRNKAAGAINKFVADKIGVTPSQAAS          | 47              | 35.0      | [6]       |
| Im-1          | -FSFKRLKGFAKKLWNSKLARKIRTKGLKYVKNFAKDMLSEGEEAPPAAEPPVEAPQ | 56              | 21.4      | [7]       |
| Parabutoporin | ---FK-LGSFLKKAWKSKLAKKLRAKGKEMLDYAKGLLEGGSSEVPGQ          | 45              | 14.6      | [2]       |
| BmKbpp        | ---FR-FGSFLKKVWWSKLAKKLRSKGKQLLDYANKVLNGPEEEAAAPAE        | 47              | 14.0      | [8]       |

<sup>a</sup>AA, Number of residues.

**Table S2.** Amino acid sequences and physiochemical properties of Smp43-derived peptides.

|    | Name         | Sequence                       | $z^a$ | $\langle H \rangle^b$ | $\langle \mu H \rangle^c$ | MW <sup>d</sup> (Da) |
|----|--------------|--------------------------------|-------|-----------------------|---------------------------|----------------------|
| 1  | Smp43(1-14)  | GVWDWIKKTAGKIW-NH <sub>2</sub> | 3     | 0.600                 | 0.590                     | 1687.0               |
| 2  | Smp43(3-16)  | WDWIKKTAGKIWNS-NH <sub>2</sub> | 3     | 0.467                 | 0.572                     | 1732.0               |
| 3  | Smp43(5-18)  | WIKKTAGKIWNSEP-NH <sub>2</sub> | 3     | 0.367                 | 0.363                     | 1656.9               |
| 4  | Smp43(7-20)  | KKTAGKIWNSEPVK-NH <sub>2</sub> | 4     | 0.094                 | 0.206                     | 1584.9               |
| 5  | Smp43(9-22)  | TAGKIWNSEPVKAL-NH <sub>2</sub> | 2     | 0.379                 | 0.259                     | 1512.8               |
| 6  | Smp43(11-24) | GKIWNSEPVKALKS-NH <sub>2</sub> | 3     | 0.265                 | 0.332                     | 1555.8               |
| 7  | Smp43(13-26) | IWNSEPVKALKSQA-NH <sub>2</sub> | 2     | 0.342                 | 0.267                     | 1569.8               |
| 8  | Smp43(15-28) | NSEPVKALKSQALN-NH <sub>2</sub> | 2     | 0.131                 | 0.231                     | 1497.7               |
| 9  | Smp43(17-30) | EPVKALKSQALNAA-NH <sub>2</sub> | 2     | 0.221                 | 0.302                     | 1438.7               |
| 10 | Smp43(19-32) | VKALKSQALNAAKN-NH <sub>2</sub> | 4     | 0.102                 | 0.312                     | 1454.7               |
| 11 | Smp43(21-34) | ALKSQALNAAKNFV-NH <sub>2</sub> | 3     | 0.301                 | 0.327                     | 1473.7               |
| 12 | Smp43(23-36) | KSQALNAAKNFVAE-NH <sub>2</sub> | 2     | 0.134                 | 0.273                     | 1489.7               |
| 13 | Smp43(25-38) | QALNAAKNFVAEKI-NH <sub>2</sub> | 2     | 0.265                 | 0.334                     | 1515.7               |
| 14 | Smp43(27-40) | LNAAKNFVAEKIGA-NH <sub>2</sub> | 2     | 0.281                 | 0.303                     | 1444.7               |
| 15 | Smp43(29-42) | AAKNFVAEKIGATP-NH <sub>2</sub> | 2     | 0.272                 | 0.189                     | 1415.6               |

<sup>a</sup> $z$ , net charge; <sup>b</sup> $\langle H \rangle$ , the mean hydrophobicity value per residue; <sup>c</sup> $\langle \mu H \rangle$ , the hydrophobic moments. A value of 0.5 means that the peptide has about 50% of the maximum possible amphipathicity. <sup>d</sup>MW, the molecular weights of the peptides were measured by mass spectrometry.

**Table S3.** Minimum inhibitory concentrations of Smp43-derived peptides against the tested bacterial strains.

| Peptides                                 | Smp43(1-14)                               | Smp43(3-16) | Smp43(5-18) | Smp43(7-20) | Smp43(9-22) | Smp43(11-24) | Smp43(13-26) | Smp43(15-28) | Smp43(17-30) | Smp43(19-32) | Smp43(21-34) | Smp43(23-36) | Smp43(25-38) | Smp43(27-40) | Smp43(29-42) |
|------------------------------------------|-------------------------------------------|-------------|-------------|-------------|-------------|--------------|--------------|--------------|--------------|--------------|--------------|--------------|--------------|--------------|--------------|
| Bacterial strains                        | Minimum inhibitory concentrations (μg/mL) |             |             |             |             |              |              |              |              |              |              |              |              |              |              |
| Gram-positive bacteria                   |                                           |             |             |             |             |              |              |              |              |              |              |              |              |              |              |
| <i>Staphylococcus aureus</i> ATCC29213   | 5                                         | >40         | >40         | >40         | >40         | >40          | >40          | >40          | >40          | >40          | >40          | >40          | >40          | >40          | >40          |
| <i>Enterococcus faecalis</i> ATCC29212   | 10                                        | >40         | >40         | >40         | >40         | >40          | >40          | >40          | >40          | >40          | >40          | >40          | >40          | >40          | >40          |
| Gram-negative bacteria                   |                                           |             |             |             |             |              |              |              |              |              |              |              |              |              |              |
| <i>Escherichia coli</i> ATCC25922        | 10                                        | >40         | >40         | >40         | >40         | >40          | >40          | >40          | >40          | >40          | >40          | >40          | >40          | >40          | >40          |
| <i>Klebsiella pneumoniae</i> ATCC700603  | 10                                        | >40         | >40         | >40         | >40         | >40          | >40          | >40          | >40          | >40          | >40          | >40          | >40          | >40          | >40          |
| <i>Pseudomonas aeruginosa</i> ATCC27853  | 10                                        | >40         | >40         | >40         | >40         | >40          | >40          | >40          | >40          | >40          | >40          | >40          | >40          | >40          | >40          |
| <i>Acinetobacter baumannii</i> ATCC19606 | 5                                         | >40         | >40         | >40         | >40         | >40          | >40          | >40          | >40          | >40          | >40          | >40          | >40          | >40          | >40          |
| HC10 <sup>a</sup>                        | 75                                        | >200        | >200        | >200        | >200        | >200         | >200         | >200         | >200         | >200         | >200         | >200         | >200         | >200         | >200         |

<sup>a</sup>HC<sub>10</sub>, the concentration of the peptide that causes 10% hemolysis of of human red blood cells.

**Table S4.** Sequence alignments between Smp43(1-14) and other scorpion venom-derived short-chain noncysteine-containing AMPs.

| Name        | Sequence                       | AA <sup>a</sup> | Identity% | Reference  |
|-------------|--------------------------------|-----------------|-----------|------------|
| Smp43(1-14) | GVWDWIKKTAGKIW-NH <sub>2</sub> | 14              | 100       | This study |
| Uy17        | -ILSAIWSGIKGLL-NH <sub>2</sub> | 13              | 23.5      | [9]        |
| Uy192       | -FLSTIWNGIKGLL-NH <sub>2</sub> | 13              | 23.5      | [9]        |
| IsCT        | -ILGKIWEGIKSLF-NH <sub>2</sub> | 13              | 23.5      | [10]       |
| Spiniferin  | -ILGEIWKGIDIL-NH <sub>2</sub>  | 13              | 23.5      | [4]        |
| BmKn2       | -FIGAIARLLSKIF-NH <sub>2</sub> | 13              | 21.4      | [11]       |
| VsCT2       | -FLKGIIDTVSKLF-NH <sub>2</sub> | 13              | 21.4      | [12]       |
| VsCT1       | -FLKGIIDTVSNWL-NH <sub>2</sub> | 13              | 20.0      | [12]       |
| Um3         | GFWGKLWEGVKSAL-NH <sub>2</sub> | 14              | 20.0      | [9]        |
| Smp13       | -ILQDIWNGIKNLF-NH <sub>2</sub> | 13              | 17.7      | [1]        |
| UyCT3       | -ILSAIWSGIKSLF-NH <sub>2</sub> | 13              | 17.7      | [9]        |
| VmCT1       | -FLGALWNVAKSVF-NH <sub>2</sub> | 13              | 17.7      | [12]       |
| Pantinin-3  | -FLSTIWNGIKSLN-NH <sub>2</sub> | 13              | 17.7      | [13]       |
| VmCT2       | -FLSTLWNAAKSIF-NH <sub>2</sub> | 13              | 14.3      | [12]       |
| Hp1404      | GILGKLWEGVKSIF-NH <sub>2</sub> | 14              | 14.3      | [14]       |
| UyCT1       | GFWGKLWEGVKNAI-NH <sub>2</sub> | 14              | 14.3      | [9]        |
| UyCT5       | -IWSAIWSGIKGLL-NH <sub>2</sub> | 13              | 14.3      | [15]       |
| Hp1035      | -IFSAGGFLKSIF-NH <sub>2</sub>  | 13              | 14.3      | [16]       |
| Meucin-13   | -IFGAIAGLLKNIF-NH <sub>2</sub> | 13              | 14.3      | [17]       |
| StCT1       | GFWGSLWEGVKSIV-NH <sub>2</sub> | 14              | 14.3      | [18]       |
| StCT2       | GFWGKLWEGVKSAL-NH <sub>2</sub> | 14              | 14.3      | [19]       |
| OcyC1       | -ILSAIWSGIKSLF-NH <sub>2</sub> | 13              | 14.3      | [20]       |
| OcyC2       | GILGKIWEGVKSIL-NH <sub>2</sub> | 14              | 14.3      | [20]       |
| Pantinin-1  | GILGKLWEGFKSIV-NH <sub>2</sub> | 14              | 14.3      | [13]       |
| Pantinin-2  | -IFGAIWKGISLL-NH <sub>2</sub>  | 13              | 14.3      | [13]       |
| Lausporin-1 | -FLSALWGVAKSLF-NH <sub>2</sub> | 13              | 11.8      | [21]       |
| IsCT2       | -IFGAIWNGIKSLF-NH <sub>2</sub> | 13              | 7.1       | [10]       |
| Um5         | -IFKAIWGGIKSLF-NH <sub>2</sub> | 13              | 7.1       | [9]        |
| Hp1090      | -IFKAIWSGIKSLF-NH <sub>2</sub> | 13              | 7.1       | [16]       |
| NDBP-5.5    | -IFSAGLLSNLL-NH <sub>2</sub>   | 13              | 7.1       | [15]       |
| Um4         | -FFSALLSGIKSLF                 | 13              | 0.00      | [9]        |

<sup>a</sup>AA, Number of residues.

## References

- Harrison, P.L.; Abdel-Rahman, M.A.; Strong, P.N.; Tawfik, M.M.; Miller, K. Characterisation of three  $\alpha$ -helical antimicrobial peptides from the venom of *Scorpio maurus palmatus*. *Toxicon*. **2016**, *117*, 30–36.
- Moerman, L.; Bosteels, S.; Noppe, W.; Willems, J.; Clynen, E.; Schoofs, L.; Thevissen, K.; Tytgat, J.; Van Eldere, J.; Van Der Walt, J.; Verdonck, F. Antibacterial and antifungal properties of  $\alpha$ -helical, cationic peptides in the venom of scorpions from southern Africa. *Eur J Biochem*. **2002**, *269*, 4799–4810.
- Corzo, G.; Escoubas, P.; Villegas, E.; Barnham, K.J.; He, W.; Norton, R.S.; Nakajima, T. Characterization of unique amphipathic antimicrobial peptides from venom of the scorpion *Pandinus imperator*. *Biochem. J.* **2001**, *359*, 35–45.
- Wu, S.; Nie, Y.; Zeng, X.C.; Cao, H.; Zhang, L.; Zhou, L.; Yang, Y.; Luo, X.; Liu, Y. Genomic and functional characterization of three new venom peptides from the scorpion *Heterometrus spinifer*. *Peptides*. **2014**, *53*, 30–41.

5. Torres-Larios, A.; Gurrola, G.B.; Zamudio, F.Z.; Possani, L.D. Hadrurin, a new antimicrobial peptide from the venom of the scorpion *Hadrurus aztecus*. *Eur. J. Biochem.* **2000**, *267*, 5023–5031.
6. Hernandez-Aponte, C.A.; Silva-Sanchez, J.; Quintero-Hernandez, V.; Rodriguez-Romero, A.; Balderas, C.; Possani, L.D.; Gurrola, G.B. Vejovine, a new antibiotic from the scorpion venom of *Vaejovis mexicanus*. *Toxicon*. **2011**, *57*, 84–92.
7. Miyashita, M.; Sakai, A.; Matsushita, N.; Hanai, Y.; Nakagawa, Y.; Miyagawa, H. A novel amphipathic linear peptide with both insect toxicity and antimicrobial activity from the venom of the scorpion *Isometrus maculatus*. *Biosci. Biotechnol. Biochem.* **2010**, *74*, 364–369.
8. Zeng, X.C.; Li, W.X.; Peng, F.; Zhu, Z.H. Cloning and characterization of a novel cDNA sequence encoding the precursor of a novel venom peptide (BmKbpb) related to a bradykinin-potentiating peptide from Chinese scorpion *Buthus martensii* Karsch. *IUBMB life* **2000**, *49*, 207–210.
9. Luna-Ramirez, K.; Tonk, M.; Rahnamaeian, M.; Vilcinskis, A. Bioactivity of natural and engineered antimicrobial peptides from venom of the scorpions *Urodacus yaschenkoi* and *U. manicatus*. *Toxins* **2017**, *9*, 22.
10. Dai, L.; Yasuda, A.; Naoki, H.; Corzo, G.; Andriantsiferana, M.; Nakajima, T. IsCT, a novel cytotoxic linear peptide from scorpion *Opisthacanthus madagascariensis*. *Biochem. Biophys. Res. Commun.* **2001**, *286*, 820–825.
11. Cao, L.; Dai, C.; Li, Z.; Fan, Z.; Song, Y.; Wu, Y.; Cao, Z.; Li, W. Antibacterial activity and mechanism of a scorpion venom peptide derivative in vitro and in vivo. *PLoS ONE* **2012**, *7*, e40135.
12. Ramirez-Carreto, S.; Quintero-Hernandez, V.; Jimenez-Vargas, J.M.; Corzo, G.; Possani, L.D.; Becerril, B.; Ortiz, E. Gene cloning and functional characterization of four novel antimicrobial-like peptides from scorpions of the family Vaejovidae. *Peptides* **2012**, *34*, 290–295.
13. Zeng, X.C.; Zhou, L.; Shi, W.; Luo, X.; Zhang, L.; Nie, Y.; Wang, J.; Wu, S.; Cao, B.; Cao, H. Three new antimicrobial peptides from the scorpion *Pandinus imperator*. *Peptides* **2013**, *45*, 28–34.
14. Li, Z.; Xu, X.; Meng, L.; Zhang, Q.; Cao, L.; Li, W.; Wu, Y.; Cao, Z. Hp1404, a new antimicrobial peptide from the scorpion *Heterometrus petersii*. *PLoS ONE* **2014**, *9*, e97539.
15. Trentini, M.M.; das Neves, R.C.; Santos, B.P.; DaSilva, R.A.; de Souza, A.C.; Mortari, M.R.; Schwartz, E.F.; Kipnis, A.; Junqueira-Kipnis, A.P. Non-disulfide-bridge peptide 5.5 from the scorpion *Hadrurus gertschi* inhibits the growth of *Mycobacterium abscessus* subsp. *massiliense*. *Front. Microbiol.* **2017**, *8*, 273.
16. Yan, R.; Zhao, Z.; He, Y.; Wu, L.; Cai, D.; Hong, W.; Wu, Y.; Cao, Z.; Zheng, C.; Li, W. A new natural  $\alpha$ -helical peptide from the venom of the scorpion *Heterometrus petersii* kills HCV. *Peptides* **2011**, *32*, 11–19.
17. Gao, B.; Sherman, P.; Luo, L.; Bowie, J.; Zhu, S. Structural and functional characterization of two genetically related meucin peptides highlights evolutionary divergence and convergence in antimicrobial peptides. *FASEB. J.* **2009**, *23*, 1230–1245.
18. Yuan, W.; Cao, L.; Ma, Y.; Mao, P.; Wang, W.; Zhao, R.; Wu, Y.; Cao, Z.; Li, W. Cloning and functional characterization of a new antimicrobial peptide gene StCT1 from the venom of the scorpion *Scorpiops tibetanus*. *Peptides* **2010**, *31*, 22–26.
19. Cao, L.; Li, Z.; Zhang, R.; Wu, Y.; Li, W.; Cao, Z. StCT2, a new antibacterial peptide characterized from the venom of the scorpion *Scorpiops tibetanus*. *Peptides* **2012**, *36*, 213–220.
20. Silva, E.C.; Camargos, T.S.; Maranhao, A.Q.; Silva-Pereira, I.; Silva, L.P.; Possani, L.D.; Schwartz, E.F. Cloning and characterization of cDNA sequences encoding for new venom peptides of the Brazilian scorpion *Opisthacanthus cayaporum*. *Toxicon*. **2009**, *54*, 252–261.
21. Zhao, Z.; Zhang, K.; Zhu, W.; Ye, X.; Ding, L.; Jiang, H.; Li, F.; Chen, Z.; Luo, X. Two new cationic  $\alpha$ -helical peptides identified from the venom gland of *Liocheles australasiae* possess antimicrobial activity against methicillin-resistant staphylococci, *Toxicon*, **2021**, In Press, <https://doi.org/10.1016/j.toxicon.2021.04.002>.
